# Supplementary material
Source: HighWire-hosted journal article supplement (https://bmjopen.bmj.com/content/7/1/e012338)
Supplement: inline-supplementary-material-3 [file inline-supplementary-material-3.pdf]

## Appendix 3A: Description of published studies characteristics and findings (chronological order)

| References                                          | [1]                                      | [2]                                              | [3]                                                 | [4]                                                                                | [5]                                               | [6]                             | [7]                                    | [8]                                                                              | [9]                                                    |
|-----------------------------------------------------|------------------------------------------|--------------------------------------------------|-----------------------------------------------------|------------------------------------------------------------------------------------|---------------------------------------------------|---------------------------------|----------------------------------------|----------------------------------------------------------------------------------|--------------------------------------------------------|
| Publication                                         | 1996                                     | 2002                                             | 2004                                                | 2004                                                                               | 2006                                              | 2006                            | 2006                                   | 2006                                                                             | 2007                                                   |
| <b>Populations</b>                                  |                                          |                                                  |                                                     |                                                                                    |                                                   |                                 |                                        |                                                                                  |                                                        |
| <b>Disease</b>                                      | T1DM                                     | T1DM                                             | T1DM                                                | T1DM                                                                               | T1DM                                              | T1DM                            | T1DM                                   | Kidney transplant                                                                | Cystic fibrosis                                        |
| <b>Enrolment age</b>                                | NR                                       | 18-29                                            | 21-29                                               | 19                                                                                 | 16-25                                             | 15-25                           | 14-24                                  | 15-19                                                                            | 18-24                                                  |
| <b>Comparison</b>                                   | Single group, pre- and post-intervention | 3 centers with differing procedures              | Single group, pre- and post-intervention            | Single group, pre- and post-intervention                                           | Historical cohort (other center)                  | Historical cohort               | Non participants                       | Non participants                                                                 | Single group, pre- and post-intervention               |
| <b>Intervention</b>                                 |                                          |                                                  |                                                     |                                                                                    |                                                   |                                 |                                        |                                                                                  |                                                        |
| <b>Age at transfer</b>                              | 16-18                                    | 14-22                                            | 20-23                                               | 19                                                                                 | NR                                                | NR                              | NR                                     | 16-19                                                                            | 16-19                                                  |
| <b>Interventions modalities</b>                     | AYAC                                     | AYAC                                             | Joint consultation in pediatrics and in adults care | Formal assessment, Educational group sessions, Transition file, Information letter | AYAC, Educational tools, Information letter       | AYAC, TC, Phone support service | AYAC, Joint consultation in pediatrics | Visit to the adult clinic, Joint consultation in adults care, Information letter | AYAC, TC, Formal assessment, Visit to the adult clinic |
| <b>Persons involved</b>                             |                                          |                                                  |                                                     |                                                                                    |                                                   |                                 |                                        |                                                                                  |                                                        |
| <b>Pediatric team</b>                               | M, P                                     | M                                                | M                                                   | no                                                                                 | M, P                                              | no                              | no                                     | M                                                                                | M, P                                                   |
| <b>Adult team</b>                                   | M, P                                     | M                                                | M                                                   | M, P                                                                               | M, P                                              | M, P                            | M                                      | M, P                                                                             | M                                                      |
| <b>Parents</b>                                      | yes                                      | no                                               | yes                                                 | yes                                                                                | no                                                | no                              | no                                     | no                                                                               | yes                                                    |
| <b>Outcomes assessment</b>                          |                                          |                                                  |                                                     |                                                                                    |                                                   |                                 |                                        |                                                                                  |                                                        |
| <b>Statistical comparison</b>                       | All outcomes                             | All outcomes                                     | HbA1c                                               | All outcomes                                                                       | All outcomes                                      | All outcomes                    | All outcomes                           | Any outcomes                                                                     | Any outcomes                                           |
| <b>Blinding</b>                                     | no                                       | no                                               | no                                                  | no                                                                                 | no                                                | no                              | no                                     | no                                                                               | no                                                     |
| <b>Health care provider's perspectives outcomes</b> |                                          |                                                  |                                                     |                                                                                    |                                                   |                                 |                                        |                                                                                  |                                                        |
| <b>Improved*</b>                                    | -                                        | -                                                | HbA1c                                               | HbA1c                                                                              | Nephropathies                                     | HbA1c                           | -                                      | -                                                                                | -                                                      |
| <b>Not improved</b>                                 | HbA1c                                    | HbA1c                                            | -                                                   | -                                                                                  | Retinopathies<br>AHT<br>Total HbA1c               | -                               | -                                      | Stable state of health<br>Compliance                                             | FEV1<br>BMI                                            |
| <b>LDC (months)</b>                                 | 12                                       | 24                                               | 24                                                  | 12                                                                                 | NR                                                | 54                              | -                                      | 12                                                                               | NR                                                     |
| <b>Patient's perspectives outcomes</b>              |                                          |                                                  |                                                     |                                                                                    |                                                   |                                 |                                        |                                                                                  |                                                        |
| <b>Improved*</b>                                    | -                                        | Satisfaction                                     | -                                                   | Knowledge/ self-management abilities                                               | -                                                 | -                               | -                                      | -                                                                                | Satisfaction                                           |
| <b>Not improved</b>                                 | -                                        | -                                                | Satisfaction                                        | QoL                                                                                | -                                                 | -                               | -                                      | Satisfaction                                                                     | QoL<br>Fears                                           |
| <b>Who collected data</b>                           | -                                        | Research nurse                                   | Nurse                                               | Adult caregivers and Young people                                                  | -                                                 | -                               | -                                      | Young people                                                                     | Young people and parents                               |
| <b>Collection method</b>                            | -                                        | Questionnaire + Structured interview with doctor | Qualitative interview                               | Questionnaire <sup>v</sup>                                                         | -                                                 | -                               | -                                      | Questionnaire                                                                    | Questionnaires <sup>v</sup>                            |
| <b>LDC (months)</b>                                 | -                                        | NR                                               | NR                                                  | 12                                                                                 | -                                                 | -                               | -                                      | 12                                                                               | 36                                                     |
| <b>Policy maker's perspectives outcomes</b>         |                                          |                                                  |                                                     |                                                                                    |                                                   |                                 |                                        |                                                                                  |                                                        |
| <b>Improved*</b>                                    | -                                        | -                                                | -                                                   | -                                                                                  | Consultation attendance<br>Complication screening | Admission for DKA               | -                                      | -                                                                                | -                                                      |
| <b>Not improved</b>                                 | -                                        | Consultation attendance                          | Consultation attendance                             | -                                                                                  | -                                                 | Admission duration              | Consultation attendance                | -                                                                                | -                                                      |
| <b>LDC (months)</b>                                 | -                                        | 24                                               | 24                                                  | -                                                                                  | NR                                                | 54                              | 18                                     | -                                                                                | -                                                      |

**T1DM:** Type 1 diabetes mellitus; **NR:** Not Reported; **AYAC:** Adolescent or young adults clinics/consultations; **TC:** Transition coordinator; **M :** Medical professionals; **P :** Paramedical or social professionals; **LDC:** Last data collection after transfer; **HbA1c :** Glycated haemoglobin; **AHT :** Arterial hypertension; **FEV1** Forced Expiratory Volume in 1 Second; **BMI:** Body mass index; **QOL:** Quality of life; **DKA:** Diabetic ketoacidosis

\* Improvement as reported by the authors <sup>S</sup> secondary criteria <sup>v</sup> at least one validated questionnaire

## Appendix 3A (continued)

| References                                          | [10]                                            | [11]                                                                                                  | [12]                                                                            | [13]                                                                                         | [14]                                                         | [15]                                                                                                     | [16]                                           | [17]                                                                                              | [18]                                                                                                                                                                 |
|-----------------------------------------------------|-------------------------------------------------|-------------------------------------------------------------------------------------------------------|---------------------------------------------------------------------------------|----------------------------------------------------------------------------------------------|--------------------------------------------------------------|----------------------------------------------------------------------------------------------------------|------------------------------------------------|---------------------------------------------------------------------------------------------------|----------------------------------------------------------------------------------------------------------------------------------------------------------------------|
| Publication                                         | 2007                                            | 2008                                                                                                  | 2008                                                                            | 2009                                                                                         | 2009                                                         | 2010                                                                                                     | 2012                                           | 2012                                                                                              | 2012                                                                                                                                                                 |
| <b>Populations</b>                                  |                                                 |                                                                                                       |                                                                                 |                                                                                              |                                                              |                                                                                                          |                                                |                                                                                                   |                                                                                                                                                                      |
| <b>Disease</b>                                      | T1DM                                            | T1DM                                                                                                  | T1DM                                                                            | T1DM                                                                                         | Renal diseases                                               | Epilepsia                                                                                                | Sickle cell disease                            | Kidney transplant                                                                                 | Kidney transplant                                                                                                                                                    |
| <b>Enrolment age</b>                                | 15-25                                           | 18-24                                                                                                 | 18                                                                              | NR                                                                                           | NR                                                           | 16-18                                                                                                    | 17-19                                          | 16-18                                                                                             | 16                                                                                                                                                                   |
| <b>Comparison</b>                                   | Non participants                                | Single group, pre- and post-intervention                                                              | Historical cohort                                                               | Historical cohort                                                                            | Single group, pre- and post-intervention                     | Single group, pre- and post-intervention                                                                 | 1: Historical cohort<br>2: Non-participants    | Historical cohort                                                                                 | Historical cohort                                                                                                                                                    |
| <b>Intervention</b>                                 |                                                 |                                                                                                       |                                                                                 |                                                                                              |                                                              |                                                                                                          |                                                |                                                                                                   |                                                                                                                                                                      |
| <b>Age at transfer</b>                              | NR                                              | NR                                                                                                    | NR                                                                              | 18-20                                                                                        | 18-23                                                        | NR                                                                                                       | NR                                             | 16-18                                                                                             | 18-20                                                                                                                                                                |
| <b>Interventions modalities</b>                     | AYAC, Individual and group educational sessions | AYAC, transition clinic, Joint consultation in adults care, Individual and group educational sessions | Educational group sessions, Phone and mail support service, Website, Newsletter | Joint consultation in pediatrics and in adults care, Transition file, TC, Information letter | Transition clinic, Educational sessions, Transition file, TC | Transition clinic, Joint consultation in adults care, Formal assessment, Individual educational sessions | TC, visit to the adult clinic                  | AYAC, transition clinic, visit to the adult clinic, Individual educational sessions, peer support | Transition clinic, Formal assessment, Individual educational sessions, Transition file, TC, email and text or call for support and education, paramedical transition |
| <b>Persons involved</b>                             |                                                 |                                                                                                       |                                                                                 |                                                                                              |                                                              |                                                                                                          |                                                |                                                                                                   |                                                                                                                                                                      |
| <b>Pediatric team</b>                               | no                                              | M, P                                                                                                  | no                                                                              | M                                                                                            | M, P                                                         | M, P                                                                                                     | M, P                                           | M, P                                                                                              | M, P                                                                                                                                                                 |
| <b>Adult team</b>                                   | M, P                                            | M, P                                                                                                  | P                                                                               | M                                                                                            | M                                                            | M, P                                                                                                     | M, P                                           | M, P                                                                                              | P                                                                                                                                                                    |
| <b>Parents</b>                                      | no                                              | no                                                                                                    | no                                                                              | no                                                                                           | no                                                           | yes                                                                                                      | yes                                            | yes                                                                                               | no                                                                                                                                                                   |
| <b>Outcomes assessment</b>                          |                                                 |                                                                                                       |                                                                                 |                                                                                              |                                                              |                                                                                                          |                                                |                                                                                                   |                                                                                                                                                                      |
| <b>Statistical comparison</b>                       | All outcomes                                    | HbA1c                                                                                                 | Hypoglycemia and DKA                                                            | All outcomes                                                                                 | Any outcomes                                                 | Any outcomes                                                                                             | Appointment                                    | Graft survival                                                                                    | Time to death / graft loss and creatinine                                                                                                                            |
| <b>Blinding</b>                                     | no                                              | no                                                                                                    | no                                                                              | no                                                                                           | no                                                           | no                                                                                                       | no                                             | no                                                                                                | no                                                                                                                                                                   |
| <b>Health care provider's perspectives outcomes</b> |                                                 |                                                                                                       |                                                                                 |                                                                                              |                                                              |                                                                                                          |                                                |                                                                                                   |                                                                                                                                                                      |
| <b>Improved*</b>                                    | -                                               | HbA1c                                                                                                 | -                                                                               | HbA1c at 12 months                                                                           | Creatinine Transplant rejection                              | -                                                                                                        | -                                              | Acute rejection<br>Graft survival time                                                            | Time to death or graft loss                                                                                                                                          |
| <b>Not improved</b>                                 | HbA1c                                           | -                                                                                                     | DKA, severe hypoglycemia                                                        | HbA1c at 36 months                                                                           | -                                                            | -                                                                                                        | -                                              | -                                                                                                 | Creatinine                                                                                                                                                           |
| <b>LDC (months)</b>                                 | 36                                              | 36                                                                                                    | 12                                                                              | 36                                                                                           | 12                                                           | -                                                                                                        | -                                              | 26                                                                                                | 24                                                                                                                                                                   |
| <b>Patient's perspectives outcomes</b>              |                                                 |                                                                                                       |                                                                                 |                                                                                              |                                                              |                                                                                                          |                                                |                                                                                                   |                                                                                                                                                                      |
| <b>Improved*</b>                                    | -                                               | -                                                                                                     | Experience of difficulties or frustration, program relevance                    | Opinion about transition                                                                     | Health knowledge                                             | Satisfaction Fears<br>Knowledge of adult care<br>Independence                                            | Satisfaction                                   | -                                                                                                 | -                                                                                                                                                                    |
| <b>Not improved</b>                                 | -                                               | -                                                                                                     | -                                                                               | -                                                                                            | Satisfaction<br>Contact in adult care                        | -                                                                                                        | -                                              | -                                                                                                 | -                                                                                                                                                                    |
| <b>Who collected data</b>                           | -                                               | -                                                                                                     | Transition team                                                                 | Caregivers                                                                                   | Young people                                                 | Young people and parents                                                                                 | Pediatric team                                 | -                                                                                                 | -                                                                                                                                                                    |
| <b>Collection method</b>                            | -                                               | -                                                                                                     | Qualitative interview                                                           | Questionnaire                                                                                | Questionnaire                                                | Questionnaire                                                                                            | Questionnaire                                  | -                                                                                                 | -                                                                                                                                                                    |
| <b>LDC (months)</b>                                 | -                                               | -                                                                                                     | 12                                                                              | 12                                                                                           | 12                                                           | 3                                                                                                        | 3                                              | -                                                                                                 | -                                                                                                                                                                    |
| <b>Policy maker's perspectives outcomes</b>         |                                                 |                                                                                                       |                                                                                 |                                                                                              |                                                              |                                                                                                          |                                                |                                                                                                   |                                                                                                                                                                      |
| <b>Improved*</b>                                    | -                                               | Consultation attendance<br>Complication screening                                                     | Number of medical and diabetes educator visits                                  | Delay of transfer, Clinical attendance                                                       | Hospitalization                                              | -                                                                                                        | Appointment with adult caregivers <sup>5</sup> | -                                                                                                 | Cost                                                                                                                                                                 |
| <b>Not improved</b>                                 | -                                               | -                                                                                                     | -                                                                               | -                                                                                            | Consultation attendance                                      | -                                                                                                        | Program participation                          | -                                                                                                 | -                                                                                                                                                                    |
| <b>LDC (months)</b>                                 | -                                               | 36                                                                                                    | 12                                                                              | 36                                                                                           | 12                                                           | -                                                                                                        | 3                                              | -                                                                                                 | 24                                                                                                                                                                   |

**T1DM:** Type 1 diabetes mellitus; **NR:** Not Reported; **AYAC:** Adolescent or young adults clinics/consultations; **TC:** Transition coordinator; **AYA:** Adolescent or young adults, **M:** Medical professionals; **P:** Paramedical or social professionals; **LDC:** Last data collection after transfer; **HbA1c:** Glycated haemoglobin; **DKA:** Diabetic ketoacidosis

\* Improvement as reported by the authors<sup>S</sup> secondary criteria<sup>V</sup> at least one validated questionnaire

## Appendix 3A (continued)

| References                                          | [19]                                                                                           | [20]                                                                                                                | [21]                                   | [22]                                              | [23]                                                 | [24]                                                                                                   | [25]                                                   | [26]                                                                                                            |                                                             |
|-----------------------------------------------------|------------------------------------------------------------------------------------------------|---------------------------------------------------------------------------------------------------------------------|----------------------------------------|---------------------------------------------------|------------------------------------------------------|--------------------------------------------------------------------------------------------------------|--------------------------------------------------------|-----------------------------------------------------------------------------------------------------------------|-------------------------------------------------------------|
| Publication                                         | 2013                                                                                           | 2013                                                                                                                | 2013                                   | 2013                                              | 2014                                                 | 2014                                                                                                   | 2015                                                   | 2015                                                                                                            |                                                             |
| <b>Populations</b>                                  |                                                                                                |                                                                                                                     |                                        |                                                   |                                                      |                                                                                                        |                                                        |                                                                                                                 |                                                             |
| Disease                                             | Liver transplant                                                                               | Cystic fibrosis                                                                                                     | CAH                                    | Kidney transplant                                 | MED                                                  | T1DM                                                                                                   | Rheumatological diseases                               | T1DM                                                                                                            |                                                             |
| Enrolment age                                       | 19-20                                                                                          | 20-34                                                                                                               | 18                                     | NR                                                | 16-20                                                | 16-19                                                                                                  | 15-26                                                  | 19-25                                                                                                           |                                                             |
| Comparison                                          | Historical cohort                                                                              | Historical cohort (same and other center)                                                                           | Historical cohort and non participants | 2 different care settings                         | Historical cohort                                    | Randomized                                                                                             | Non participants                                       | Centre with differing procedures                                                                                |                                                             |
| <b>Intervention</b>                                 |                                                                                                |                                                                                                                     |                                        |                                                   |                                                      |                                                                                                        |                                                        |                                                                                                                 |                                                             |
| Age at transfer                                     | NR                                                                                             | 17-21                                                                                                               | NR                                     | NR                                                | NR                                                   | NR                                                                                                     | NR                                                     | NR                                                                                                              |                                                             |
| Interventions modalities                            | Formal assessment, Transition file, TC, social networking website                              | Joint consultation in pediatrics, visit to the adult clinic, Formal assessment, Individual educational sessions, TC | AYAC, Joint consultation in pediatrics | AYAC, alternating appointments                    | TC, Formal assessment                                | TC, Phone support service, USB stick with contact details, websites of useful services and information | Formal assessment, TC, Information letter for patients | AYAC, Individual educational sessions, TC, peer support, transition resource website, social networking website |                                                             |
| <b>Persons involved</b>                             |                                                                                                |                                                                                                                     |                                        |                                                   |                                                      |                                                                                                        |                                                        |                                                                                                                 |                                                             |
| Pediatric team                                      | P                                                                                              | M, P                                                                                                                | M, P                                   | M                                                 | TC                                                   | P                                                                                                      | SW                                                     | P, M                                                                                                            |                                                             |
| Adult team                                          | no                                                                                             | M, P                                                                                                                | M, P                                   | M                                                 | no                                                   | no                                                                                                     | no                                                     | no                                                                                                              |                                                             |
| Parents                                             | yes                                                                                            | yes                                                                                                                 | no                                     | no                                                | yes                                                  | no                                                                                                     | yes                                                    | no                                                                                                              |                                                             |
| <b>Outcomes assessment</b>                          |                                                                                                |                                                                                                                     |                                        |                                                   |                                                      |                                                                                                        |                                                        |                                                                                                                 |                                                             |
| Statistical comparison                              | Healthcare outcomes                                                                            | All outcomes                                                                                                        | All outcomes                           | Creatinine, GFR, AHT, Treatment use, Satisfaction | Length of time to transition                         | All outcomes                                                                                           | Appointments                                           | All except number of routine diabetes clinic visits                                                             |                                                             |
| Blinding                                            | no                                                                                             | no                                                                                                                  | no                                     | no                                                | no                                                   | no                                                                                                     | no                                                     | no                                                                                                              |                                                             |
| <b>Health care provider's perspectives outcomes</b> |                                                                                                |                                                                                                                     |                                        |                                                   |                                                      |                                                                                                        |                                                        |                                                                                                                 |                                                             |
| Improved*                                           | Medication adherence, deaths and grafts lost <sup>S</sup>                                      | -                                                                                                                   | -                                      | -                                                 | Rejection and graft loss                             | -                                                                                                      | HbA1c <sup>S</sup>                                     | ≥2 adult provider appointments                                                                                  | HbA1c <sup>S</sup> , incidence of hypoglycemia <sup>S</sup> |
| Not improved                                        | -                                                                                              | -                                                                                                                   | -                                      | -                                                 | Creatinine levels and GFR values, AHT, treatment use | -                                                                                                      | Complications <sup>S</sup> (not applicable comparison) | -                                                                                                               | -                                                           |
| LDC (months)                                        | 12                                                                                             | -                                                                                                                   | -                                      | 12                                                | -                                                    | 12                                                                                                     | 6-8                                                    | 12                                                                                                              |                                                             |
| <b>Patient's perspectives outcomes</b>              |                                                                                                |                                                                                                                     |                                        |                                                   |                                                      |                                                                                                        |                                                        |                                                                                                                 |                                                             |
| Improved*                                           | Concerns                                                                                       | Self-perceived health and satisfaction pre T                                                                        | -                                      | Transfer perceived as a large change              | -                                                    | -                                                                                                      | -                                                      | Past month Well-being <sup>S</sup>                                                                              |                                                             |
| Not improved                                        | Preferences about transition <sup>S</sup> Health care management <sup>S</sup> QoL <sup>S</sup> | Independence and anxiety pre T and post T Self-perceived health and satisfaction post T                             | -                                      | Other satisfaction measures                       | -                                                    | Global self-worth <sup>S</sup>                                                                         | Satisfaction (Not Compared)                            | Other psychosocial measures <sup>S</sup>                                                                        |                                                             |
| Who collected data                                  | Pediatric caregivers                                                                           | Young people                                                                                                        | -                                      | Young people                                      | -                                                    | Young people                                                                                           | Young people                                           | Young people                                                                                                    |                                                             |
| Collection method                                   | Questionnaire <sup>V</sup>                                                                     | Questionnaire                                                                                                       | -                                      | Questionnaire                                     | -                                                    | Questionnaire <sup>V</sup>                                                                             | Questionnaire                                          | Questionnaire <sup>V</sup>                                                                                      |                                                             |
| LDC (months)                                        | 12                                                                                             | 96                                                                                                                  | -                                      | NR                                                | -                                                    | 12                                                                                                     | 3                                                      | 12                                                                                                              |                                                             |
| <b>Policy maker's perspectives outcomes</b>         |                                                                                                |                                                                                                                     |                                        |                                                   |                                                      |                                                                                                        |                                                        |                                                                                                                 |                                                             |
| Improved*                                           | -                                                                                              | -                                                                                                                   | -                                      | -                                                 | Length of time to transition                         | -                                                                                                      | -                                                      | -                                                                                                               |                                                             |
| Not improved                                        | -                                                                                              | -                                                                                                                   | Lost patients                          | Number of outpatient clinic visits                | Continuity of care                                   | Engagement and retention in the adult service Hospitalizations <sup>S</sup>                            | -                                                      | Number of routine visits and transfers Health-care utilization <sup>S</sup>                                     |                                                             |
| LDC (months)                                        | -                                                                                              | -                                                                                                                   | 36                                     | 12                                                | NR                                                   | 12                                                                                                     | -                                                      | 3-12                                                                                                            |                                                             |

CAH : Congenital adrenal hyperplasia ; MED : mental or emotional disorder ; T1DM: Type 1 diabetes mellitus; NR: Not Reported; TC: Transition coordinator; SW: social worker, AYAC: Adolescent or young adults clinics/consultations; P : Paramedical or social professionals; M : Medical professionals; LDC: Last data collection after transfer; GFR: Glomerular filtration rate; AHT : Arterial Hypertension HbA1c : Glycated haemoglobin; QOL: Quality of life; Pre-T/ Post-T: Before/ After transfer

\* Improvement as reported by the authors<sup>S</sup> secondary criteria<sup>V</sup> at least one validated questionnaire

## Appendix 3B : Description of studies in progress characteristics (no final results published)

| References                                          | [27]                             | [28]                                                                                                                                                           | [29]*                                                                                                                              | [30]                        | [31]                                                                                   | [32]                                                                                                              | [33]                                                                                                                 |
|-----------------------------------------------------|----------------------------------|----------------------------------------------------------------------------------------------------------------------------------------------------------------|------------------------------------------------------------------------------------------------------------------------------------|-----------------------------|----------------------------------------------------------------------------------------|-------------------------------------------------------------------------------------------------------------------|----------------------------------------------------------------------------------------------------------------------|
| Publication                                         | 2006                             | 2010                                                                                                                                                           | 2011                                                                                                                               | 2012                        | 2012                                                                                   | 2012                                                                                                              | 2012                                                                                                                 |
| <b>Populations</b>                                  |                                  |                                                                                                                                                                |                                                                                                                                    |                             |                                                                                        |                                                                                                                   |                                                                                                                      |
| <b>Disease</b>                                      | IBD                              | T1DM or T2D managed with insulin                                                                                                                               | IBD                                                                                                                                | Asthma                      | Congenital heart disease, cardiomyopathy.                                              | All chronic condition or cognitive Disability                                                                     | Acquired brain injury and cerebral palsy                                                                             |
| <b>Enrolment age</b>                                | 16                               | 16-29                                                                                                                                                          | >16                                                                                                                                | 17-19                       | 15-17                                                                                  | >19                                                                                                               | 16-17                                                                                                                |
| <b>Comparison</b>                                   | Randomized                       | Parallel group not randomized                                                                                                                                  | Single group, pre- and post-intervention                                                                                           | Randomized                  | Randomized                                                                             | Randomized                                                                                                        | 1: Historical cohort<br>2: Service with differing procedures (youths with spina bifida)                              |
| <b>Intervention</b>                                 |                                  |                                                                                                                                                                |                                                                                                                                    |                             |                                                                                        |                                                                                                                   |                                                                                                                      |
| <b>Interventions modalities</b>                     | Joint consultation in pediatrics | Intervention 1 : Educational and behavioral sessions in group, peer support (Intervention 2 : educational sessions , transition clinic, behavioral evaluation) | Transition clinic, joint consultation in pediatrics, Formal assessment at the time of transition                                   | Education sessions          | Individual educational and self management sessions, Follow up by the nurse            | Transition clinic, Educational group sessions, Transition file, TC, Information letter for patients, Peer support | Formal assessment, Individual educational sessions, Transition file, TC, peer support                                |
| <b>Persons involved</b>                             |                                  |                                                                                                                                                                |                                                                                                                                    |                             |                                                                                        |                                                                                                                   |                                                                                                                      |
| <b>Pediatric team</b>                               | M                                | P, (M)                                                                                                                                                         | P,M                                                                                                                                | NR                          | P                                                                                      | M, P                                                                                                              | M,P                                                                                                                  |
| <b>Adult team</b>                                   | M                                | (M)                                                                                                                                                            | P, M                                                                                                                               | no                          | no                                                                                     | no                                                                                                                | M,P                                                                                                                  |
| <b>Parents</b>                                      | no                               | no                                                                                                                                                             | no                                                                                                                                 | no                          | no                                                                                     | no                                                                                                                | yes                                                                                                                  |
| <b>Outcomes assessment</b>                          |                                  |                                                                                                                                                                |                                                                                                                                    |                             |                                                                                        |                                                                                                                   |                                                                                                                      |
| <b>Blinding</b>                                     | no                               | no                                                                                                                                                             | no                                                                                                                                 | no                          | no                                                                                     | no                                                                                                                | no                                                                                                                   |
| <b>Health care provider's perspectives outcomes</b> |                                  |                                                                                                                                                                |                                                                                                                                    |                             |                                                                                        |                                                                                                                   |                                                                                                                      |
| <b>Reported</b>                                     | IBD flare                        | HbA1c <sup>s</sup>                                                                                                                                             | -                                                                                                                                  | Asthma Control <sup>s</sup> | -                                                                                      | -                                                                                                                 | -                                                                                                                    |
| <b>LDC (months)</b>                                 | 12                               | 12                                                                                                                                                             | -                                                                                                                                  | 12                          | -                                                                                      | -                                                                                                                 | -                                                                                                                    |
| <b>Patient's perspectives outcomes</b>              |                                  |                                                                                                                                                                |                                                                                                                                    |                             |                                                                                        |                                                                                                                   |                                                                                                                      |
| <b>Reported</b>                                     | -                                | Self-efficacy, diabetes knowledge, QoL, family conflict, treatment satisfaction, using some form of social networking <sup>s</sup>                             | Disease and medication knowledge, effects of disease on daily living, sources of support and advice, readiness, transition anxiety | QoL                         | Disease knowledge <sup>s</sup> , self-management and self-advocacy skills <sup>s</sup> | Self-care and transition related skills                                                                           | Perceived health and well-being <sup>s</sup> , social participation <sup>s</sup> , transition readiness <sup>s</sup> |
| <b>Who collected data</b>                           | -                                | NR                                                                                                                                                             | Young people                                                                                                                       | NR                          | NR                                                                                     | Member of the research team                                                                                       | Young people                                                                                                         |
| <b>Collection method</b>                            | -                                | NR                                                                                                                                                             | Questionnaires                                                                                                                     | Questionnaire <sup>v</sup>  | NR                                                                                     | Questionnaire <sup>v</sup> (phone or online)                                                                      | Questionnaire <sup>v</sup>                                                                                           |
| <b>LDC (months)</b>                                 | -                                | 12                                                                                                                                                             | NR                                                                                                                                 | 12                          | 6 - 18 months post enrolment                                                           | 6                                                                                                                 | 12                                                                                                                   |
| <b>Policy maker's perspectives outcomes</b>         |                                  |                                                                                                                                                                |                                                                                                                                    |                             |                                                                                        |                                                                                                                   |                                                                                                                      |
| <b>Reported</b>                                     | -                                | Kind of provider <sup>s</sup> ; provider and educator time devoted <sup>s</sup>                                                                                | -                                                                                                                                  | -                           | Excess time to first ACHD clinic appointment                                           | At least 1 visit with an adult provider within 10 months of the baseline visit.                                   | Maintenance of continuous care, health care utilization <sup>s</sup>                                                 |
| <b>LDC (months)</b>                                 | -                                | 6-12                                                                                                                                                           | -                                                                                                                                  | -                           | 12 - 24 months post enrolment                                                          | 10                                                                                                                | 12                                                                                                                   |

**IBD:** Inflammatory Bowel Disease; **T1DM:** Type 1 diabetes mellitus, **T2D:** type 2 diabetes; **NR:** Not Reported; **TC:** Transition coordinator; **P :** Paramedical or social professionals; **M :** Medical professionals; **LDC:** Last data collection after transfer; **HbA1c :** Glycated haemoglobin; ; **QOL:** Quality of life; **ACHD :** adult congenital heart disease;

<sup>s</sup> secondary criteria <sup>v</sup> at least one validated questionnaire

\* Greveson study is not strictly at protocol stage but results available were not the definitive ones

## Appendix 3B (continued)

| References                                   | [34]                                                                                                                                                                                                                                      | [35]                                                                                                  | [36]                                                                                                                                                                        | [37]                                                                                                                                                                                                                                      | [38]                                                                                                                     | [39]                                                                    |
|----------------------------------------------|-------------------------------------------------------------------------------------------------------------------------------------------------------------------------------------------------------------------------------------------|-------------------------------------------------------------------------------------------------------|-----------------------------------------------------------------------------------------------------------------------------------------------------------------------------|-------------------------------------------------------------------------------------------------------------------------------------------------------------------------------------------------------------------------------------------|--------------------------------------------------------------------------------------------------------------------------|-------------------------------------------------------------------------|
| Publication                                  | 2013                                                                                                                                                                                                                                      | 2013                                                                                                  | 2013                                                                                                                                                                        | 2014                                                                                                                                                                                                                                      | 2014                                                                                                                     | 2015                                                                    |
| Populations                                  |                                                                                                                                                                                                                                           |                                                                                                       |                                                                                                                                                                             |                                                                                                                                                                                                                                           |                                                                                                                          |                                                                         |
| <b>Disease</b>                               | Juvenile idiopathic arthritis                                                                                                                                                                                                             | IBD                                                                                                   | T1DM                                                                                                                                                                        | Kidney transplantation                                                                                                                                                                                                                    | heart transplantation                                                                                                    | SCD                                                                     |
| <b>Enrolment age</b>                         | 14–16                                                                                                                                                                                                                                     | 16-18                                                                                                 | 17-20                                                                                                                                                                       | 16-22                                                                                                                                                                                                                                     | ≥18                                                                                                                      | 18-23                                                                   |
| <b>Comparison</b>                            | Centers with differing transition procedures                                                                                                                                                                                              | Randomized                                                                                            | Randomized                                                                                                                                                                  | Randomized                                                                                                                                                                                                                                | Randomized                                                                                                               | Single group, pre- and post-intervention                                |
| Intervention                                 |                                                                                                                                                                                                                                           |                                                                                                       |                                                                                                                                                                             |                                                                                                                                                                                                                                           |                                                                                                                          |                                                                         |
| <b>Interventions modalities</b>              | Visit to the adult clinic, Educational group sessions, Educational tools, TC, Information letter, Phone support service, Peer support                                                                                                     | Transition file, Educational tools, Phone and mail support service                                    | Individual educational sessions, Educational tools, TC, Phone, mail or text support service                                                                                 | Apps designed to support the documentation and transfer of clinical data and to facilitate appointment scheduling                                                                                                                         | Phone support service, computer-based education modules with associated self-tests                                       | Music therapy, Educational group sessions                               |
| Persons involved                             |                                                                                                                                                                                                                                           |                                                                                                       |                                                                                                                                                                             |                                                                                                                                                                                                                                           |                                                                                                                          |                                                                         |
| <b>Pediatric team</b>                        | P,M                                                                                                                                                                                                                                       | P                                                                                                     | P                                                                                                                                                                           | no                                                                                                                                                                                                                                        | P                                                                                                                        | no                                                                      |
| <b>Adult team</b>                            | P,M                                                                                                                                                                                                                                       | no                                                                                                    | no                                                                                                                                                                          | no                                                                                                                                                                                                                                        | P                                                                                                                        | P                                                                       |
| <b>Parents</b>                               | yes                                                                                                                                                                                                                                       | no                                                                                                    | no                                                                                                                                                                          | no                                                                                                                                                                                                                                        | no                                                                                                                       | no                                                                      |
| Outcomes assessment                          |                                                                                                                                                                                                                                           |                                                                                                       |                                                                                                                                                                             |                                                                                                                                                                                                                                           |                                                                                                                          |                                                                         |
| <b>Blinding</b>                              | no                                                                                                                                                                                                                                        | no                                                                                                    | Analysts and outcome assessors                                                                                                                                              | no                                                                                                                                                                                                                                        | Subject                                                                                                                  | no                                                                      |
| Health care provider's perspectives outcomes |                                                                                                                                                                                                                                           |                                                                                                       |                                                                                                                                                                             |                                                                                                                                                                                                                                           |                                                                                                                          |                                                                         |
| <b>Reported</b>                              | -                                                                                                                                                                                                                                         | Medication Adherence, Disease Activity <sup>s</sup>                                                   | HbA1c testing <sup>s</sup> , HbA1c levels <sup>s</sup>                                                                                                                      | Therapy adherence, change in eGFR <sup>s</sup> , serum creatinine levels <sup>s</sup> , transplant survival <sup>s</sup> , patient survival <sup>s</sup> , acute rejection <sup>s</sup> , death <sup>s</sup> transplant loss <sup>s</sup> | Immunosuppressant levels and blood draws <sup>s</sup> , medication adherence <sup>s</sup> , acute rejection <sup>s</sup> | -                                                                       |
| <b>LDC (months)</b>                          | -                                                                                                                                                                                                                                         | 12 months post randomization                                                                          | 24                                                                                                                                                                          | 12                                                                                                                                                                                                                                        | 6                                                                                                                        | -                                                                       |
| Patient's perspectives outcomes              |                                                                                                                                                                                                                                           |                                                                                                       |                                                                                                                                                                             |                                                                                                                                                                                                                                           |                                                                                                                          |                                                                         |
| <b>Reported</b>                              | Self perceived health status, health status as perceived by parents <sup>s</sup> , medication adherence <sup>s</sup> , QoL <sup>s</sup> , illness-related knowledge <sup>s</sup> , Fatigue <sup>s</sup> , parenting outcomes <sup>s</sup> | Satisfaction Transition Readiness <sup>s</sup> , QoL <sup>s</sup> , Knowledge of Disease <sup>s</sup> | Satisfaction and perception of the care <sup>s</sup>                                                                                                                        | Satisfaction <sup>s</sup> , QoL <sup>s</sup> , social integration <sup>s</sup>                                                                                                                                                            | -                                                                                                                        | Trust in health care providers, sickle cell self-efficacy and knowledge |
| <b>Who collected data</b>                    | Young people +/- Parents                                                                                                                                                                                                                  | Young people                                                                                          | Young people                                                                                                                                                                | Young people                                                                                                                                                                                                                              | -                                                                                                                        | NR                                                                      |
| <b>Collection method</b>                     | Questionnaires <sup>v</sup>                                                                                                                                                                                                               | Questionnaires <sup>v</sup>                                                                           | Questionnaires                                                                                                                                                              | Questionnaires                                                                                                                                                                                                                            | -                                                                                                                        | Questionnaires <sup>v</sup>                                             |
| <b>LDC (months)</b>                          | 3                                                                                                                                                                                                                                         | 12 months post randomization                                                                          | 24                                                                                                                                                                          | 12                                                                                                                                                                                                                                        | -                                                                                                                        | 12                                                                      |
| Policy maker's perspectives outcomes         |                                                                                                                                                                                                                                           |                                                                                                       |                                                                                                                                                                             |                                                                                                                                                                                                                                           |                                                                                                                          |                                                                         |
| <b>Improved*</b>                             | -                                                                                                                                                                                                                                         | Non-Routine Healthcare Utilization                                                                    | At least one outpatient adult specialist visit, testing for complications, foot, and retinal examinations <sup>s</sup> , emergency visits and hospitalizations <sup>s</sup> | Healthcare utilization <sup>s</sup>                                                                                                                                                                                                       | Transition program adherence                                                                                             | Rate of adherence to clinic appointments <sup>s</sup>                   |
| <b>LDC (months)</b>                          | -                                                                                                                                                                                                                                         | 12 months post randomization                                                                          | 24                                                                                                                                                                          | 12                                                                                                                                                                                                                                        | 6                                                                                                                        | 12                                                                      |

**IBD**: Inflammatory Bowel Disease ; **T1DM**: Type 1 diabetes mellitus; **SCD** : sickle cell disease; **TC**: Transition coordinator; **P** : Paramedical or social professionals; **M** : Medical professionals; **LDC**: Last data collection after transfer; **HbA1c** : Glycated haemoglobin; **GFR**: Glomerular filtration rate; **QOL**: Quality of life; **NR**: Not Reported;

<sup>s</sup> secondary criteria <sup>v</sup> at least one validated questionnaire

## Bibliography

- 1 Orr DP, Fineberg NS, Gray DL. Glycemic control and transfer of health care among adolescents with insulin dependent diabetes mellitus. *J Adolesc Health Off Publ Soc Adolesc Med* 1996;18:44–7. doi:10.1016/1054-139X(95)00044-S
- 2 Kipps S, Bahu T, Ong K, *et al.* Current methods of transfer of young people with Type 1 diabetes to adult services. *Diabet Med J Br Diabet Assoc* 2002;19:649–54.
- 3 Vanelli M, Caronna S, Adinolfi B, *et al.* Effectiveness of an uninterrupted procedure to transfer adolescents with Type 1 diabetes from the Paediatric to the Adult Clinic held in the same hospital: eight-year experience with the Parma protocol. *Diabetes Nutr Metab* 2004;17:304–8.
- 4 Vidal M, Jansa M, Anguita C, *et al.* Impact of a special therapeutic education programme in patients transferred from a paediatric to an adult diabetes unit. *Eur Diabetes Nurs* 2004;1:23–7. doi:10.1002/edn.5
- 5 Gholap N, Pillai M, Virmani S, *et al.* The Alphabet Strategy and standards of care in young adults with type 1 diabetes. *Br J Diabetes Vasc Dis* 2006;6:168–70. doi:10.1177/14746514060060040401
- 6 Holmes-Walker DJ, Llewellyn AC, Farrell K. A transition care programme which improves diabetes control and reduces hospital admission rates in young adults with Type 1 diabetes aged 15-25 years. *Diabet Med J Br Diabet Assoc* 2007;24:764–9. doi:10.1111/j.1464-5491.2007.02152.x
- 7 Johnston P, Bell P, Tennes H, *et al.* Audit of young people with type 1 diabetes transferring from paediatric to adult diabetic services. *Pract Diabetes Int* 2006;23:106–8. doi:10.1002/pdi.914
- 8 Remorino R, Taylor J. Smoothing things over: the transition from pediatric to adult care for kidney transplant recipients. *Prog Transplant Aliso Viejo Calif* 2006;16:303–8.
- 9 Craig P, Dieppe P, Macintyre S, *et al.* Developing and evaluating complex interventions: the new Medical Research Council guidance. *BMJ* 2008;337:a1655.
- 10 Lane JT, Ferguson A, Hall J, *et al.* Glycemic control over 3 years in a young adult clinic for patients with type 1 diabetes. *Diabetes Res Clin Pract* 2007;78:385–91. doi:10.1016/j.diabres.2007.04.014
- 11 Logan J, Peralta E, Brown K, *et al.* Smoothing the transition from paediatric to adult services in type 1 diabetes. *J Diabetes Nurs* 2008;12.
- 12 Van Walleghem N, MacDonald CA, Dean HJ. Evaluation of a Systems Navigator Model for Transition From Pediatric to Adult Care for Young Adults With Type 1 Diabetes. *Diabetes Care* 2008;31:1529–30. doi:10.2337/dc07-2247
- 13 Cadario F, Prodam F, Bellone S, *et al.* Transition process of patients with type 1 diabetes (T1DM) from paediatric to the adult health care service: a hospital-based approach. *Clin Endocrinol (Oxf)* 2009;71:346–50. doi:10.1111/j.1365-2265.2008.03467.x
- 14 Chaturvedi S, Jones CL, Walker RG, *et al.* The transition of kidney transplant recipients: a work in progress. *Pediatr Nephrol* 2009;24:1055–60. doi:10.1007/s00467-009-1124-y
- 15 Jurasek L, Ray L, Quigley D. Development and implementation of an adolescent epilepsy transition clinic. *J Neurosci Nurs J Am Assoc Neurosci Nurses* 2010;42:181–9.
- 16 Hankins JS, Osarogiagbon R, Adams-Graves P, *et al.* A transition pilot program for adolescents with sickle cell disease. *J Pediatr Health Care Off Publ Natl Assoc Pediatr Nurse Assoc Pract* 2012;26:e45-49. doi:10.1016/j.pedhc.2012.06.004
- 17 Harden PN, Walsh G, Bandler N, *et al.* Bridging the gap: an integrated paediatric to adult clinical service for young adults with kidney failure. *BMJ* 2012;344:e3718–e3718. doi:10.1136/bmj.e3718
- 18 Prestidge C, Romann A, Djurdjev O, *et al.* Utility and cost of a renal transplant transition clinic. *Pediatr Nephrol* 2012;27:295–302. doi:10.1007/s00467-011-1980-0
- 19 Annunziato RA, Baisley MC, Arrato N, *et al.* Strangers headed to a strange land? A pilot study of using a transition coordinator to improve transfer from pediatric to adult services. *J Pediatr* 2013;163:1628–33. doi:10.1016/j.jpeds.2013.07.031
- 20 Chaudhry SR, Keaton M, Nasr SZ. Evaluation of a cystic fibrosis transition program from pediatric to adult care. *Pediatr Pulmonol* 2013;48:658–65. doi:10.1002/ppul.22647
- 21 Gleeson H, Davis J, Jones J, *et al.* The challenge of delivering endocrine care and successful transition to adult services in adolescents with congenital adrenal hyperplasia: experience in a single centre over 18 years. *Clin Endocrinol (Oxf)* 2013;78:23–8. doi:10.1111/cen.12053
- 22 Pape L, Lämmermühle J, Oldhafer M, *et al.* Different models of transition to adult care after pediatric kidney transplantation: A comparative study. *Pediatr Transplant* 2013;17:518–24. doi:10.1111/petr.12102
- 23 Cappelli M, Davidson S, Racek J, *et al.* Transitioning Youth into Adult Mental Health and Addiction Services: An Outcomes Evaluation of the Youth Transition Project. *J Behav Health Serv Res* Published Online First: 9 October 2014. doi:10.1007/s11414-014-9440-9
- 24 Steinbeck KS, Shrewsbury VA, Harvey V, *et al.* A pilot randomized controlled trial of a post-discharge program to support emerging adults with type 1 diabetes mellitus transition from pediatric to adult care: RCT of a transition program in T1DM. *Pediatr Diabetes* 2014;:n/a-n/a. doi:10.1111/pedi.12229

- 25 Jensen PT, Karnes J, Jones K, *et al.* Quantitative evaluation of a pediatric rheumatology transition program. *Pediatr Rheumatol* 2015;13. doi:10.1186/s12969-015-0013-0
  - 26 Sequeira PA, Pyatak EA, Weigensberg MJ, *et al.* Let's Empower and Prepare (LEAP): Evaluation of a Structured Transition Program for Young Adults With Type 1 Diabetes. *Diabetes Care* 2015;:dc142577. doi:10.2337/dc14-2577
  - 27 Schwartz D. Transition Study of Inflammatory Bowel Disease (IBD) Patients From Pediatric Gastroenterologist to Adult Gastroenterologist. *Clin Internet* Published Online First: 2 August 2006.<http://clinicaltrials.gov/show/NCT00360022>
  - 28 Midyett K. Transition of Adolescents and Young Adults With Diabetes From Pediatric to Adult Care. *Clin Internet* Published Online First: 19 April 2010.<http://clinicaltrials.gov/show/NCT01109797>
  - 29 Greveson K, Morgan N, Furman M, *et al.* Attitudes and Experiences of Adolescents in an Innovative IBD Transition Service. *Gastrointest Nurs* 2011;9:35–40. doi:10.12968/gasn.2011.9.1.35
  - 30 Davidson W. Implementation of a Pediatric-to-adult Asthma Transition Program. *Clin Internet* Published Online First: 23 January 2012.<http://clinicaltrials.gov/show/NCT01521247>
  - 31 Mackie A. The CHAPTER II Study - Congenital Heart Adolescents Participating in Transition Evaluation Research. *Clin Internet* Published Online First: 5 November 2012.<http://clinicaltrials.gov/show/NCT01723332>
  - 32 Peter N. Primary Care Transition Study. *Clin Internet* Published Online First: 13 December 2012.<http://clinicaltrials.gov/show/NCT01750892>
  - 33 Tsybina I, Kingsnorth S, Maxwell J, *et al.* Longitudinal Evaluation of Transition Services (“LETS Study”): Protocol for outcome evaluation. *BMC Pediatr* 2012;12:51. doi:10.1186/1471-2431-12-51
  - 34 Hilderson D, Westhovens R, Wouters C, *et al.* Rationale, design and baseline data of a mixed methods study examining the clinical impact of a brief transition programme for young people with juvenile idiopathic arthritis: the DON'T RETARD project. *BMJ Open* 2013;3:e003591–e003591. doi:10.1136/bmjopen-2013-003591
  - 35 Nguyen G. Improving Outcomes in the Pediatric to Adult Care Transition in Inflammatory Bowel Disease (IMPACT-IBD). *Clin Internet* Published Online First: 23 December 2013.<http://clinicaltrials.gov/show/NCT02085083>
  - 36 Spaic T, Mahon JL, Hramiak I, *et al.* Multicentre randomized controlled trial of structured transition on diabetes care management compared to standard diabetes care in adolescents and young adults with type 1 diabetes (Transition Trial). *BMC Pediatr* 2013;13:163. doi:10.1186/1471-2431-13-163
  - 37 Kreuzer M, Prüfe J, Bethe D, *et al.* The TRANSNephro-study examining a new transition model for post-kidney transplant adolescents and an analysis of the present health care: study protocol for a randomized controlled trial. *Trials* 2014;15:505. doi:10.1186/1745-6215-15-505
  - 38 Pahl E. Pediatric Heart Transplantation: Transitioning to Adult Care (TRANSIT). *Clin Internet* Published Online First: 5 March 2014.<http://clinicaltrials.gov/show/NCT02090257>
  - 39 Rodgers-Melnick S. Music Therapy in Sickle Cell Transition Study. *Clin Internet* Published Online First: 4 June 2015.<http://clinicaltrials.gov/show/NCT02466555>
-
